# Supplementary material for: Assessing diagnostic value of microRNAs from peripheral blood mononuclear cells and extracellular vesicles in Myalgic Encephalomyelitis/Chronic Fatigue Syndrome
Source: PubMed Central journal article supplement (PMC7005890; doi:10.1038/s41598-020-58506-5), 2020-02-07
Supplement: 41598_2020_58506_MOESM1_ESM.pdf [file 41598_2020_58506_MOESM1_ESM.pdf]

## **Supplementary Information**

### **Assessing diagnostic value of microRNAs from peripheral blood mononuclear cells and extracellular vesicles in Myalgic Encephalomyelitis/Chronic Fatigue Syndrome**

Eloy Almenar-Pérez, Leonor Sarría, Lubov Nathanson and Elisa Oltra\*

**Supplementary table S1.** Analytic variables measured in donor blood samples (either healthy controls (HC) or ME/CFS patients). Variables showing significant differences ( $p < 0.05$ ) between HC and ME/CFS groups, or those showing a tendency ( $p < 0.1$ ) appear bolded.

| Analytic variable                               | HC           |              | ME/CFS       |              | Range              | p value       |
|-------------------------------------------------|--------------|--------------|--------------|--------------|--------------------|---------------|
|                                                 | Mean         | +/- SD       | Mean         | +/- SD       |                    |               |
| <b>Creatine phosphokinase (U/L)</b>             | <b>88.67</b> | <b>30.7</b>  | <b>59.93</b> | <b>25.02</b> | <b>167 - 190</b>   | <b>0.006*</b> |
| <b>Alkaline Phosphatase (ALP) (U/L)</b>         | <b>55.4</b>  | <b>13.03</b> | <b>69.33</b> | <b>23.22</b> | <b>0 - 33</b>      | <b>0.055</b>  |
| <b>Eosinophils (10<sup>9</sup>/L)</b>           | <b>0.28</b>  | <b>0.21</b>  | <b>0.17</b>  | <b>0.16</b>  | <b>0.10 - 0.46</b> | <b>0.074</b>  |
| <b>Free T4 (pmol/L)</b>                         | <b>13.75</b> | <b>2.48</b>  | <b>15.15</b> | <b>2.24</b>  | <b>12.0 - 22.0</b> | <b>0.085</b>  |
| Platelets (10 <sup>9</sup> /L)                  | 254.73       | 56.94        | 239.67       | 81.23        | 150 - 400          | 0.106         |
| Inorganic phosphate (mmol/L)                    | 1.2          | 0.34         | 1.05         | 0.12         | 0 - 20             | 0.115         |
| Mean corpuscular hemoglobin concentration (g/L) | 322.73       | 14.41        | 329.2        | 10.02        | 310 - 360          | 0.128         |
| Potassium (mmol/L)                              | 4.19         | 0.48         | 4.03         | 0.47         | 3.5 - 5.1          | 0.175         |
| Rheumatoid factor                               | 19.73        | 1.03         | 24.47        | 17.3         | <22                | 0.179         |
| Monocytes (10 <sup>9</sup> /L)                  | 0.4          | 0.12         | 0.47         | 0.17         | 0.1 - 0.8          | 0.197         |
| Estimated glomerular filtration rate (eGFR)     | 89.93        | 6.67         | 86.33        | 6.34         | >60                | 0.233         |
| Serum vitamin B12 (pg/mL)                       | 398.67       | 125.36       | 544.67       | 356.46       | 160 - 680          | 0.250         |
| Mean corpuscular haemoglobin (pg)               | 29.04        | 1.62         | 29.65        | 1.31         | 27.0 - 33.0        | 0.264         |
| Total calcium (mmol/L)                          | 2.31         | 0.07         | 2.43         | 0.11         | 2.20 - 2.60        | 0.301         |
| Albumin (g/L)                                   | 43.4         | 4.19         | 46.01        | 2.84         | 20 - 35            | 0.326         |
| Haemoglobin (g/L)                               | 127.47       | 7.03         | 130.27       | 8.4          | 130 - 180          | 0.330         |
| Basophils (10 <sup>9</sup> /L)                  | 0.033        | 0.017        | 0.04         | 0.02         | 0.00 - 0.20        | 0.331         |
| Adjusted calcium (mmol/L)                       | 2.33         | 0.08         | 2.35         | 0.09         | 0.93 - 1.45        | 0.384         |
| Urea (mmol/L)                                   | 4.37         | 0.8          | 4.02         | 1.32         | 2.5 - 7.1          | 0.413         |
| Creatinine. umol/L.                             | 64.33        | 9.43         | 62.27        | 9.79         | 49 - 92            | 0.561         |
| Total bilirubin (umol/L)                        | 9.33         | 4.78         | 8.33         | 4.51         | 35 - 50            | 0.601         |
| Neutrophils (10 <sup>9</sup> /L)                | 3.53         | 1.09         | 3.77         | 1.48         | 1.8 - 7.7          | 0.625         |
| Lymphocytes (10 <sup>9</sup> /L)                | 1.82         | 0.32         | 1.74         | 0.58         | 1.4 - 3.5          | 0.678         |
| White Blood Cells (10 <sup>9</sup> /L)          | 6.06         | 1.23         | 6.21         | 1.88         | 4.0 - 11.0         | 0.812         |
| Sodium (mmol/L)                                 | 140          | 2.24         | 140          | 2.14         | 133 - 145          | 0.818         |
| Mean corpuscular volume (fl)                    | 89.95        | 4.45         | 90.07        | 2.62         | 80.0 - 98.0        | 0.929         |
| Free T3 (pmol/L)                                | 4.19         | 0.53         | 4.17         | 0.49         | 3.9 - 6.5          | 0.944         |
| Haematocrit                                     | 0.4          | 0.02         | 0.39         | 0.02         | 0.400 - 0.470      | 0.961         |
| RBC (10 <sup>12</sup> /L)                       | 4.4          | 0.28         | 4.4          | 0.29         | 4.40 - 5.40        | 0.975         |
| C Reactive protein (CRP)                        | 1.07         | 1.7          | 0.8          | 1.08         | <9                 | 1.000         |

**Supplementary table S2.** RNA yields and integrity from PBMCs. as determined by the 2100 Agilent capillary electrophoresis system (**A**). PBMCs 1-15 corresponded to ME/CFS samples and 16-30 to HCs. RIN <7 are indicated by asterisks. RNA yields from EVs, as determined by the 2100 Agilent capillary electrophoresis system (**B**). EVs 1-15 corresponded to ME/CFS samples and 16-30 to HCs.

| <b>A</b> | <b>RNA_ID</b> | <b>conc ng/μl</b> | <b>RIN</b> |
|----------|---------------|-------------------|------------|
|          | PBMC1         | 70.2              | 8.5        |
|          | PBMC2         | 97.1              | 7.9        |
|          | PBMC3         | 59.8              | 8.3        |
|          | PBMC4         | 60                | 8.2        |
|          | PBMC5         | 57.4              | 8.4        |
|          | PBMC6         | 56                | 7.4        |
|          | PBMC7         | 113               | 8.3        |
|          | PBMC8         | 156               | 8.2        |
|          | PBMC9         | 67.8              | 7.8        |
|          | PBMC10        | 76.3              | 8.6        |
|          | PBMC11        | 64.5              | 8.4        |
|          | PBMC12        | 87.3              | 8.4        |
|          | PBMC13        | 54.9              | 7.8        |
|          | PBMC14        | 64.9              | 7.7        |
|          | PBMC15        | 91.3              | 7.9        |
|          | PBMC16        | 106               | 8.1        |
|          | PBMC17        | 54.5              | 7.6        |
|          | PBMC18        | 82.9              | 7.9        |
|          | PBMC19        | 90.1              | 8.6        |
|          | PBMC20        | 103               | 8.5        |
|          | PBMC21        | 14.3              | 4.6*       |
|          | PBMC22        | 79.4              | 8          |
|          | PBMC23        | 54.5              | 7.3        |
|          | PBMC24        | 80.3              | 8.7        |
|          | PBMC25        | 10.1              | 4.3*       |
|          | PBMC26        | 185               | 8.3        |
|          | PBMC27        | 91                | 8.3        |
|          | PBMC28        | 67.6              | 8.4        |
|          | PBMC29        | 81.6              | 8.6        |
|          | PBMC30        | 75.7              | 8.3        |

| <b>B</b> | <b>RNA_ID</b> | <b>conc ng/μl</b> | <b>RIN</b> |
|----------|---------------|-------------------|------------|
|          | EXO1          | 9.44              | NA         |
|          | EXO2          | 9.17              | NA         |
|          | EXO3          | 13.2              | NA         |
|          | EXO4          | 9.01              | NA         |
|          | EXO5          | 8.46              | NA         |
|          | EXO6          | 5.63              | NA         |
|          | EXO7          | 5.46              | NA         |
|          | EXO8          | 5.35              | NA         |
|          | EXO9          | 12                | NA         |
|          | EXO10         | 14.1              | NA         |
|          | EXO11         | 10.5              | NA         |
|          | EXO12         | 10.9              | NA         |
|          | EXO13         | 9.47              | NA         |
|          | EXO14         | 6.92              | NA         |
|          | EXO15         | 5.43              | NA         |
|          | EXO16         | 7.02              | NA         |
|          | EXO17         | 15.1              | NA         |
|          | EXO18         | 17.6              | NA         |
|          | EXO19         | 19.3              | NA         |
|          | EXO20         | 15                | NA         |
|          | EXO21         | 13.2              | NA         |
|          | EXO22         | 17                | NA         |
|          | EXO23         | 7.44              | NA         |
|          | EXO24         | 5.09              | NA         |
|          | EXO25         | 5.19              | NA         |
|          | EXO26         | 14.5              | NA         |
|          | EXO27         | 25.7              | NA         |
|          | EXO28         | 21.2              | NA         |
|          | EXO29         | 19.3              | NA         |
|          | EXO30         | 17.4              | NA         |

**Supplementary table S3.** Differentially expressed miRNAs in PBMCs of ME/CFS and HC PBMCs as determined by nanostring analysis after applying Chauvenet criterion for outliers ( $p < 0.05$ ). MiRNAs differentially expressed, both, in PBMCs and EVs are bolded. Those showing a tendency ( $p < 0.1$ ) are marked with an asterisk.

| Probeset ID                            | HC (N)      | ME/CFS (N)  | Fold-change | p-value |
|----------------------------------------|-------------|-------------|-------------|---------|
| <b>hsa-miR-374a-5p</b>                 | 435.6 (11)  | 648.7 (11)  | 1.49        | 0.002   |
| Hsa-miR-4516                           | 78.21 (10)  | 129.3 (13)  | 1.65        | 0.003   |
| hsa-miR-644a                           | 209 (12)    | 135 (12)    | -1.55       | 0.012   |
| hsa-miR-340-5p                         | 151.9 (11)  | 189.8 (12)  | 1.25        | 0.013   |
| hsa-miR-451a                           | 1067 (11)   | 471.4 (12)  | -2.26       | 0.019   |
| hsa-miR-140-5p                         | 202.45 (12) | 263.78 (13) | 1.3         | 0.020   |
| <b>hsa-miR-4454 &amp; hsa-miR-7975</b> | 8644 (10)   | 7082 (12)   | -1.22       | 0.021   |
| hsa-miR-18a-5p                         | 69 (11)     | 82.52 (12)  | 1.2         | 0.021   |
| hsa-miR-146a-5p                        | 555.8 (12)  | 706.7 (12)  | 1.27        | 0.024   |
| hsa-miR-549a                           | 201.59 (12) | 122.06 (13) | -1.65       | 0.030   |
| hsa-miR-106a-5p hsa-miR-17-5p          | 461.1 (12)  | 516.5 (12)  | 1.12        | 0.033   |
| hsa-miR-106b-5p                        | 184.9 (11)  | 220.6 (12)  | 1.19        | 0.037   |
| hsa-miR-361-3p                         | 190.29 (12) | 148.57 (13) | -1.28       | 0.040   |
| hsa-miR-1253                           | 173.2 (12)  | 113.2 (12)  | -1.53       | 0.045   |
| hsa-miR-590-5p                         | 151.2 (12)  | 133.8 (12)  | -1.13       | 0.052   |
| <b>hsa-miR-21-5p*</b>                  | 588.99 (12) | 791(13)     | 1.34        | 0.060   |

**Supplementary table S4.** Differentially expressed miRNAs in ME/CFS and HC in EVs ( $p < 0.05$ ) as determined by nanostring analysis, after applying Chauvenet criterion for outliers. MiRNAs differentially expressed, both, in PBMCs and EVs are bolded. Those showing a tendency ( $p < 0.1$ ) are marked with an asterisk.

| Probeset ID                      | HC (N)     | ME/CFS (N) | Fold-change | p-value |
|----------------------------------|------------|------------|-------------|---------|
| <b>hsa-miR-4454&amp;miR-7975</b> | 191.7 (12) | 465.8 (12) | 2.43        | 0.0043  |
| hsa-miR-150-5p                   | 17.00 (13) | 19.86 (12) | 1.17        | 0.0053  |
| hsa-miR-15a-5p                   | 17.00 (13) | 30.94 (12) | 1.82        | 0.0212  |
| hsa-miR-183-5p                   | 26.94 (13) | 18.98 (11) | -1.42       | 0.0254  |
| hsa-miR-33a-5p                   | 302.0 (14) | 258.2 (12) | -1.17       | 0.0328  |
| hsa-let-7d-5p                    | 29.14 (12) | 50.72 (12) | 1.74        | 0.0329  |
| hsa-miR-423-5p                   | 25.65 (13) | 55.02 (12) | 2.15        | 0.035   |
| <b>hsa-miR-374a-5p</b>           | 24.04 (13) | 34.85 (12) | 1.45        | 0.0356  |
| hsa-miR-130a-3p                  | 17.06 (12) | 32.29 (12) | 1.89        | 0.0408  |
| <b>hsa-miR-21-5p*</b>            | 17.23 (13) | 28.40 (12) | 1.65        | 0.0547  |
| hsa-miR-320e*                    | 19.16 (13) | 26.78 (12) | 1.40        | 0.0578  |
| hsa-miR-203a-5p*                 | 28.70 (14) | 21.36 (12) | -1.34       | 0.0596  |
| hsa-miR-185-5p*                  | 21.74 (13) | 33.12 (12) | 1.52        | 0.076   |
| hsa-miR-607*                     | 29.35 (12) | 25.32 (11) | -1.16       | 0.0794  |
| hsa-let-7g-5p*                   | 40.61(13)  | 70.38 (12) | 1.73        | 0.0864  |
| hsa-miR-126-3p*                  | 73.38 (13) | 183.1 (12) | 2.50        | 0.0866  |
| hsa-miR-223-3p*                  | 193.6 (13) | 515.9 (12) | 2.66        | 0.0866  |
| hsa-miR-369-3p*                  | 24.93 (13) | 20.57 (12) | -1.21       | 0.0971  |
| hsa-miR-93-5p*                   | 30.63 (13) | 47.37 (12) | 1.55        | 0.1048  |

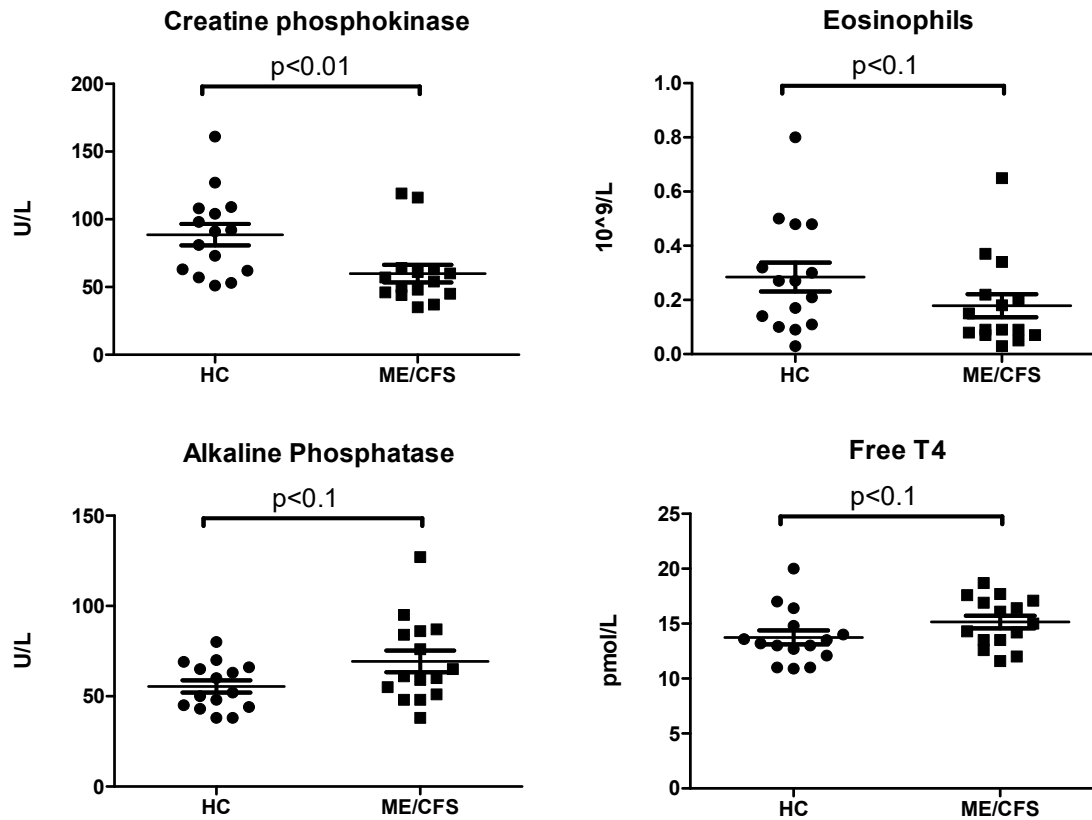

**Supplementary figure S1.** Clinical parameters showing significant differences ( $p < 0.05$ ) or tendencies ( $p < 0.1$ ) between groups (HC and ME/CFS, as indicated). Free T4 corresponds to free thyroxine. Means are indicated by horizontal bars, whiskers show standard deviation values ( $\pm$ SD) (t-test).

# 2100 Agilent expert small RNA

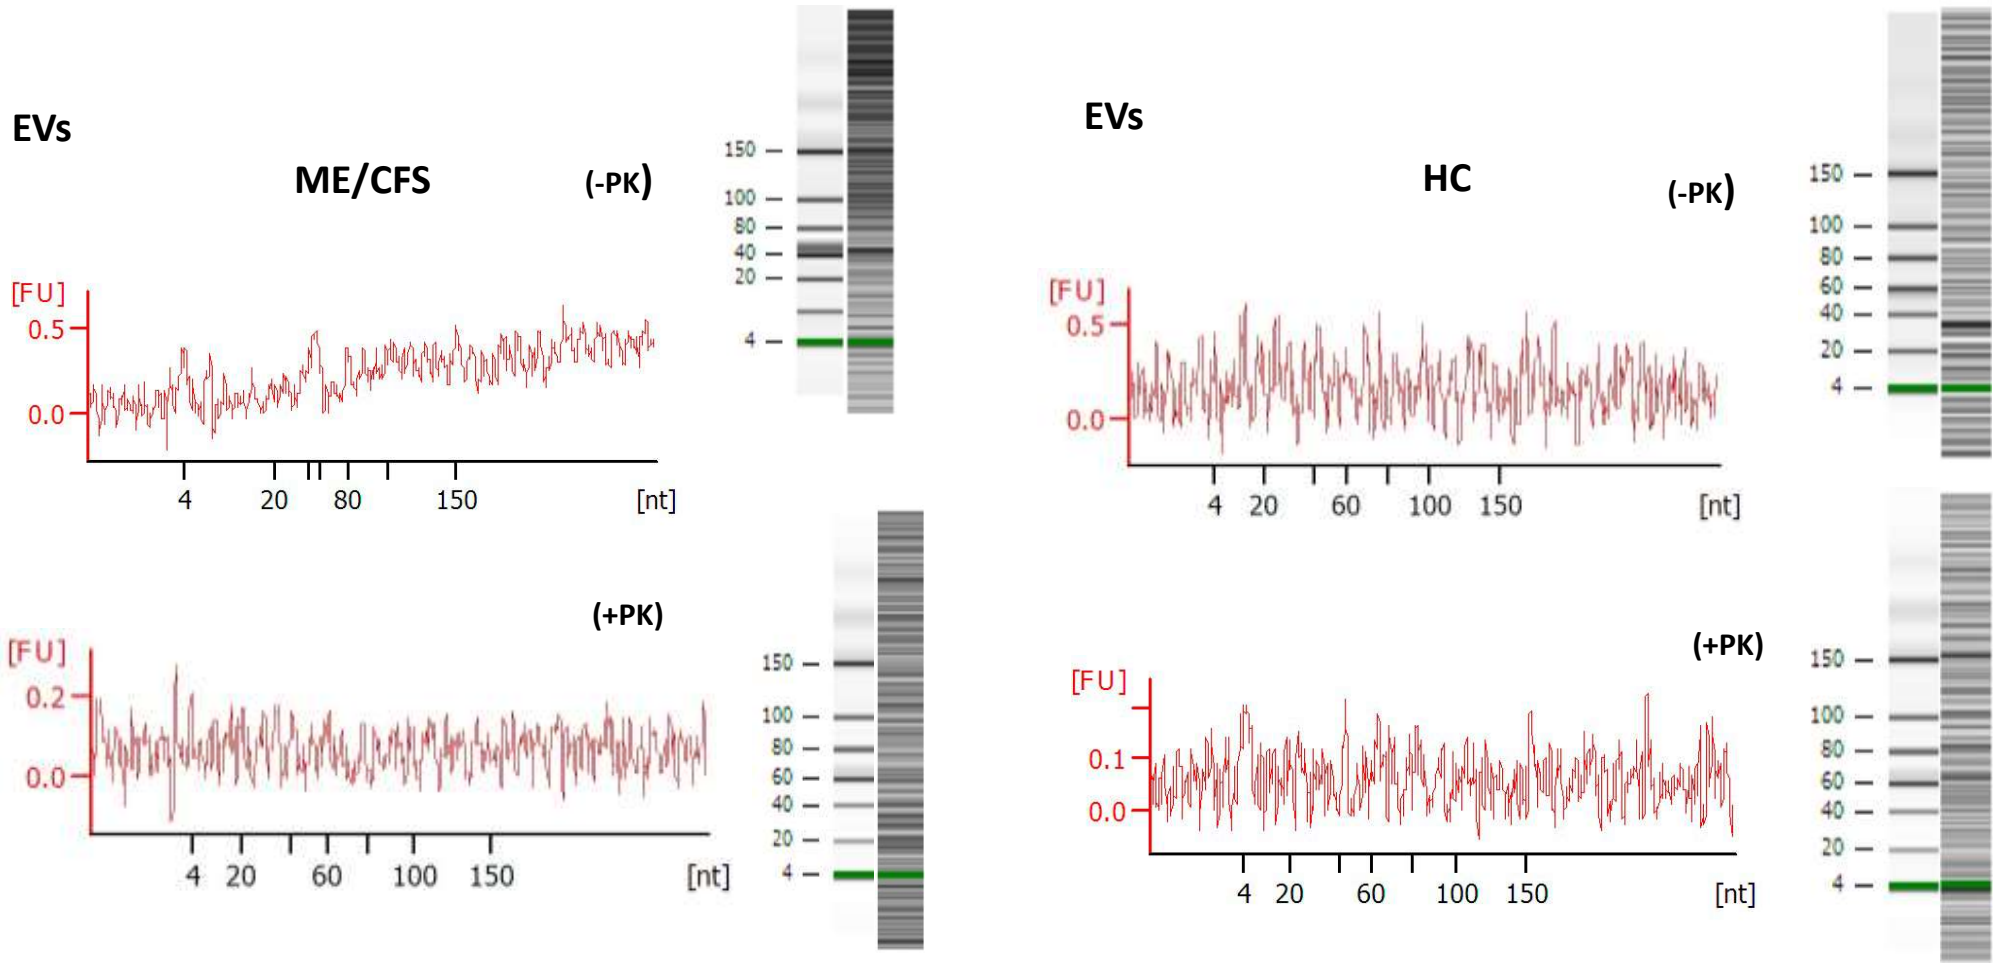

**Supplementary figure S2.** Representative electropherograms of total RNA extracted from plasma EVs (skipping proteinase K pretreatment (-PK) or including it (+PK)), obtained with 2100 Agilent expert small RNA from an ME/CFS patient (left) and a HC (right), as indicated.

PBMCs

ME/CFS

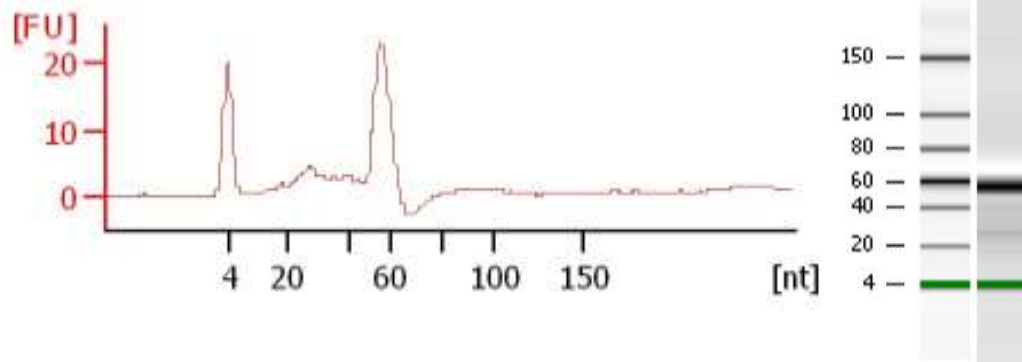

PBMCs

HC

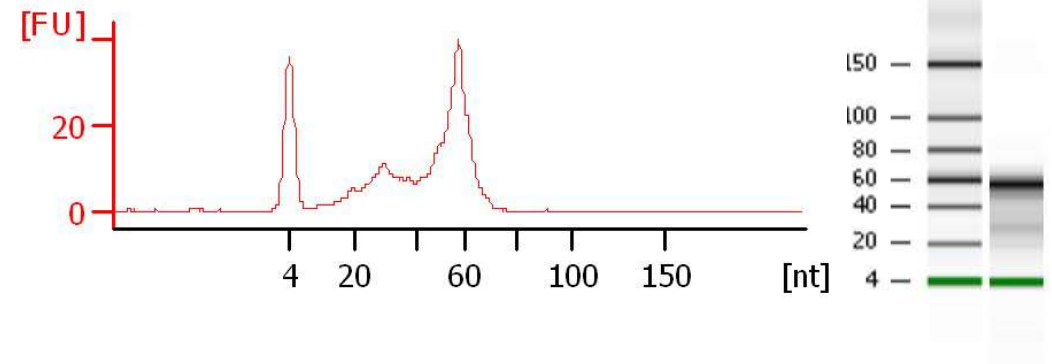

**Supplementary figure S3.** Representative electropherograms of total RNA extracted from PBMCs obtained with 2100 Agilent expert small RNA from an ME/CFS patient (left) and a HC (right), as indicated.



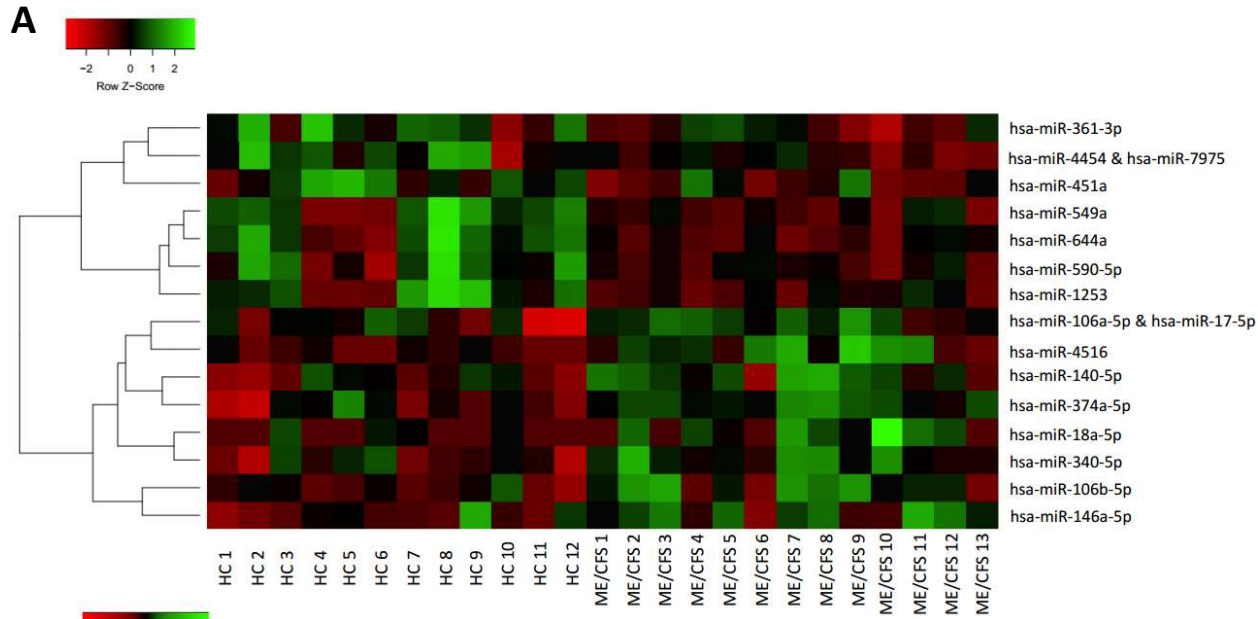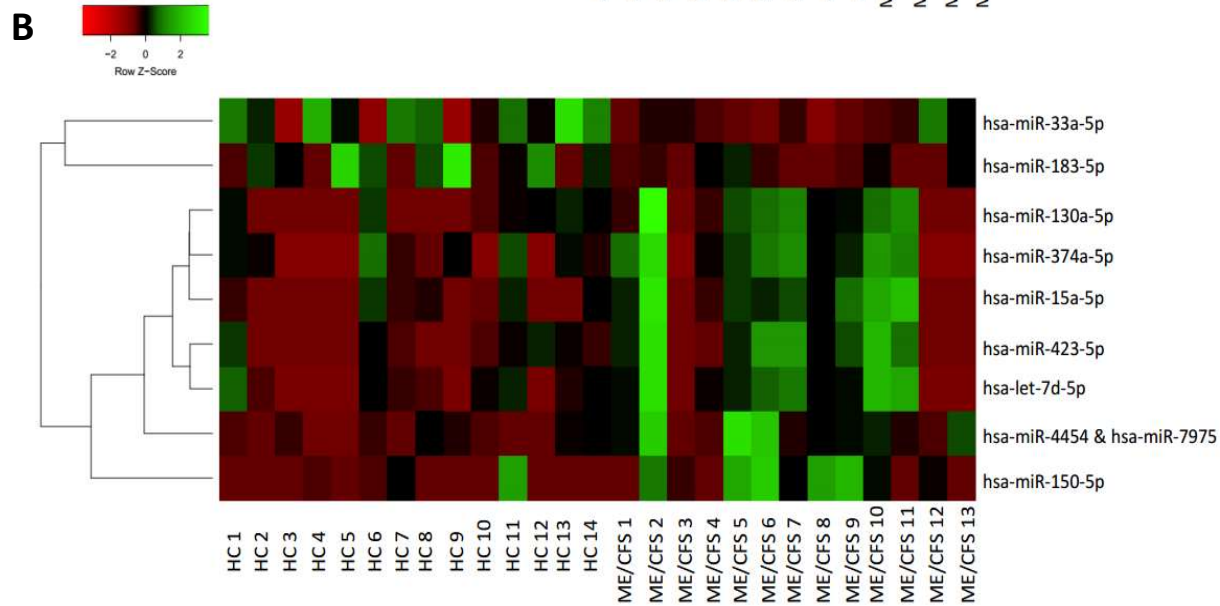

**Supplementary figure S4.** Heatmaps of significant differentially expressed miRNAs ( $p < 0.05$ ) in ME/CFS are shown. Seventeen miRNAs were found in PBMCs (9 overexpressed and 8 under expressed) (A); and ten in EVs (8 overexpressed and 2 under expressed) (B).
